# Supplementary material
Source: publisher site journal article supplement (https://www.dovepress.com/article/424454)
Supplement: Supplementary file 1 [file get_supplementary_file.php]

**Supplemental Table 1** Baseline characteristics before and after IPTW

| Characteristics | Before IPTW | | | | After IPTW | | | |
| --- | --- | --- | --- | --- | --- | --- | --- | --- |
| NCRT(n=200) | NICT(n=81) | *P* value | SMD | NCRT(n=262) | NICT(n=275) | *P* value | *SMD* |
| Sex |  |  |  |  |  |  |  |  |
| Male | 176 (88.0%) | 70 (86.4%) | 0.870 | 0.047 | 231 (88.2%) | 242 (88.0%) | 0.969 | 0.005 |
| Female | 24 (12.0%) | 11 (13.6%) |  |  | 31 (11.8%) | 33 (12.0%) |  |  |
| Age |  |  |  |  |  |  |  |  |
| <60 | 83 (41.5%) | 27 (33.3%) | 0.256 | 0.169 | 100 (38.2%) | 117 (42.5%) | 0.718 | 0.089 |
| ≥60 | 117 (58.5%) | 54 (66.7%) |  |  | 162 (61.8%) | 158 (57.5%) |  |  |
| Smoking |  |  |  |  |  |  |  |  |
| No | 80 (40.0%) | 35 (43.2%) | 0.718 | 0.065 | 110 (42.0%) | 110 (40.0%) | 0.786 | 0.040 |
| Yes | 120 (60.0%) | 46 (56.8%) |  |  | 152 (58.0%) | 165 (60.0%) |  |  |
| Drinking |  |  |  |  |  |  |  |  |
| No | 90 (45.0%) | 42 (51.9%) | 0.363 | 0.137 | 125 (47.7%) | 142 (51.6%) | 0.609 | 0.079 |
| Yes | 110 (55.0%) | 39 (48.1%) |  |  | 137 (52.3%) | 133 (48.4%) |  |  |
| Comorbidity |  |  |  |  |  |  |  |  |
| No | 128 (64.0%) | 57 (70.4%) | 0.378 | 0.136 | 178 (67.9%) | 186 (67.6%) | 0.965 | 0.006 |
| Yes | 72 (36.0%) | 24 (29.6%) |  |  | 84 (32.1%) | 89 (32.4%) |  |  |
| Family history |  |  |  |  |  |  |  |  |
| No | 192 (96.0%) | 74 (91.4%) | 0.202 | 0.192 | 249 (95.0%) | 261 (94.9%) | 0.962 | 0.006 |
| Yes | 8 (4.0%) | 7 (8.6%) |  |  | 13 ( 5.0%) | 14 ( 5.1%) |  |  |
| KPS |  |  |  |  |  |  |  |  |
| ≤80 | 150 (75.0%) | 60 (74.1%) | 0.992 | 0.021 | 193 (73.7%) | 210 (76.4%) | 0.662 | 0.062 |
| >80 | 50 (25.0%) | 21 (25.9%) |  |  | 69 (26.3%) | 65 (23.6%) |  |  |
| Tumor location |  |  |  |  |  |  |  |  |
| Lower-thoracic | 107 (53.5%) | 36 (44.4%) | 0.166 | 0.252 | 129 (49.2%) | 130 (47.3%) | 0.471 | 0.211 |
| Middle-thoracic | 80 (40.0%) | 42 (51.95) |  |  | 120 (45.8%) | 116 (42.2%) |  |  |
| Upper-thoracic | 13 (6.5%) | 3 (3.7%) |  |  | 13 ( 5.0%) | 29 (10.5%) |  |  |
| Clinical stage T |  |  |  |  |  |  |  |  |
| T2 | 9 (4.5%) | 5 (6.2%) | 0.602 | 0.127 | 16 ( 6.1%) | 13 ( 4.7%) | 0.542 | 0.198 |
| T3 | 185 (92.5%) | 72 (88.9%) |  |  | 234 (89.3%) | 236 (85.8%) |  |  |
| T4 | 6 (3.0%) | 4 (4.9%) |  |  | 12 ( 4.6%) | 26 ( 9.5%) |  |  |
| Clinical stage N |  |  |  |  |  |  |  |  |
| N0 | 62 (31.0%) | 21 (25.9%) | 0.484 | 0.113 | 78 (29.8%) | 75 (27.3%) | 0.706 | 0.055 |
| N+ | 138 (69.0%) | 60 (74.1%) |  |  | 184 (70.2%) | 200 (72.7%) |  |  |
| Clinical stage TNM |  |  |  |  |  |  |  |  |
| II | 60 (30.0%) | 21 (25.9%) | 0.433 | 0.159 | 76 (29.0%) | 75 (27.3%) | 0.962 | 0.041 |
| III | 137 (68.5%) | 57 (70.4%) |  |  | 178 (67.9%) | 192 (69.8%) |  |  |
| IV | 3 (1.5%) | 3 (3.7%) |  |  | 8 ( 3.1%) | 8 ( 2.9%) |  |  |
| Neoadjuvant cycle |  |  |  |  |  |  |  |  |
| <2 | 27 (13.5%) | 1 (1.2%) | 0.004 | 0.483 | 27 (10.3%) | 21 ( 7.6%) | 0.750 | 0.094 |
| ≥2 | 173 (86.5%) | 80 (98.85) |  |  | 235 (89.7%) | 254 (92.4%) |  |  |
| PET-CT |  |  |  |  |  |  |  |  |
| No | 148 (74.0%) | 62 (76.5%) | 0.770 | 0.059 | 197 (75.2%) | 189 (68.7%) | 0.402 | 0.144 |
| Yes | 52 (26.0%) | 19 (23.5%) |  |  | 65 (24.8%) | 86 (31.3%) |  |  |
| EUS |  |  |  |  |  |  |  |  |
| No | 88 (44.0%) | 29 (35.8%) | 0.259 | 0.168 | 99 (37.8%) | 101 (36.7%) | 0.883 | 0.022 |
| Yes | 112 (56.0%) | 52 (64.2%) |  |  | 163 (62.2%) | 174 (63.3%) |  |  |
| Chemotherapy |  |  |  |  |  |  |  |  |
| TP | 179 (89.5%) | 75 (92.6%) | 0.566 | 0.108 | 181 (69.1%) | 221 (80.4%) | 0.065 | 0.262 |
| FP | 21 (10.5%) | 6 (7.4%) |  |  | 81 (30.9%) | 54 (19.6%) |  |  |
| Surgical approach |  |  |  |  |  |  |  |  |
| Thoracotomy | 63 (31.5%) | 19 (23.5%) | 0.231 | 0.181 | 29 (11.1%) | 18 ( 6.5%) | 0.257 | 0.160 |
| MIE | 137 (68.5%) | 62 (76.5%) |  |  | 233 (88.9%) | 257 (93.5%) |  |  |
| Surgical interval(week)a | 5.78±1.34 | 5.67±1.46 | 0.548 | 0.078 | 5.81±1.34 | 5.71±1.41 | 0.644 | 0.070 |

**Abbreviations**: IPTW, inverse probability of treatment weighting; NCRT, neoadjuvant chemoradiotherapy; NICT, neoadjuvant immunotherapy combined with chemotherapy; SMD, standardized mean difference; Comorbidity: including hypertension, diabetes mellitus, chronic obstructive pulmonary disease, coronary atherosclerotic heart disease; KPS, Karnofsky Performance Status; EUS, endoscopic ultrasound; TP, platinum-based drugs and paclitaxel/albumin paclitaxel; PF, platinum-based drugs and fluorouracil; MIE, minimally invasive esophagectomy; a, Data presented as mean ± standard deviation.

**Supplemental Table 2** Comparative analysis of pathological outcomes between NCRT and NICT before and after IPTW.

| Clinicopathologic  characteristics | Before IPTW After IPTW | | | | | |
| --- | --- | --- | --- | --- | --- | --- |
| NCRT(n=200) | NICT(n=81) | P value | NCRT(n=262) | NICT(n=275) | *P* value |
| TRG |  |  |  |  |  |  |
| 0 | 113 (56.5%) | 30 (37.0%) | 0.012 | 151 (57.6%) | 93 (33.8%) | 0.012 |
| 1 | 28 (14.0%) | 22 (27.2%) |  | 34 (13.0%) | 63 (22.9%) |  |
| 2 | 42 (21.0%) | 22 (27.2%) |  | 58 (22.1%) | 94 (34.2%) |  |
| 3 | 17 (8.5%) | 7 (8.6%) |  | 19 ( 7.3%) | 25 ( 9.1%) |  |
| R0 resection |  |  |  |  |  |  |
| Yes | 196 (98.0%) | 79 (97.5%) | 1.000 | 257 (98.1%) | 268 (97.5%) | 0.745 |
| No | 4 (2.0%) | 2 (2.5%) |  | 5 ( 1.9%) | 7 ( 2.5%) |  |
| pCR |  |  |  |  |  |  |
| pCR | 94 (47.0%) | 24 (29.6%) | 0.011 | 125 (47.7%) | 76 (27.6%) | 0.005 |
| Non-pCR | 106 (53.0%) | 57 (70.4%) |  | 137 (52.3%) | 199 (72.4%) |  |
| Primary lesion |  |  |  |  |  |  |
| complete pathological remission | 107 (53.5%) | 29 (35.8%) | 0.011 | 144 (55.0%) | 90 (32.7%) | 0.003 |
| No | 93 (46.5%) | 52 (64.2%) |  | 118 (45.0%) | 185 (67.3%) |  |
| Lymph nodes |  |  |  |  |  |  |
| complete pathological remission | 159 (79.5%) | 55 (67.9%) | 0.056 | 209 (79.8%) | 169 (61.5%) | 0.010 |
| No | 41 (20.5%) | 26 (32.1%) |  | 53 (20.2%) | 106 (38.5%) |  |
| Neural invasion |  |  |  |  |  |  |
| Yes | 17 (8.5%) | 4 (4.9%) | 0.437 | 18 ( 6.9%) | 15 ( 5.5%) | 0.679 |
| No | 183 (91.5%) | 77 (95.1%) |  | 244 (93.1%) | 260 (94.5%) |  |
| LVSI |  |  |  |  |  |  |
| Yes | 3 (1.5%) | 7 (8.6%) | 0.010 | 3 ( 1.1%) | 22 ( 8.0%) | 0.002 |
| No | 197 (98.5%) | 74 (91.4%) |  | 259 (98.9%) | 253 (92.0%) |  |

**Abbreviations**: IPTW, inverse probability of treatment weighting; NCRT, neoadjuvant chemoradiotherapy; NICT, neoadjuvant immunotherapy combined with chemotherapy; TRG, tumor regression grade; pCR, pathological complete remission; LVSI, lymphovascular invasion.

**Supplemental Table 3** Postoperative information.

| Postoperative information | Before IPTW After IPTW | | | | | | | | | |
| --- | --- | --- | --- | --- | --- | --- | --- | --- | --- | --- |
| NCRT(n=200) | | NICT(n=81) | | P value | NCRT(n=262) | | NICT(n=275) | | *P* value |
| Postoperative complications | 54(27.0%) | 17(21.0%) | | 0.295 | | 74 (28.2%) | 72 ( 26.2%) | | 0.802 | |
| Anastomotic leakage | 30 (15.0%) | 7 (8.6%) | | 0.154 | | 41.0 (15.6%) | 23 ( 8.4%) | | 0.154 | |
| Pulmonary complications | 14 (7.0%) | 9 (11.1%) | | 0.256 | | 17.0 ( 6.5%) | 44 ( 16.0%) | | 0.090 | |
| Anastomotic Stenosis | 3 (1.5%) | 0 (0.0%) | | 0.269 | | 5 ( 1.9%) | 0 ( 0.0%) | | 0.085 | |
| Wound infection/ Others | 7 (3.5%) | 1 (1.2%) | | 0.303 | | 11 ( 4.2%) | 5 ( 1.8%) | | 0.421 | |
| POLS(day)a | 17.5±8.9 | 14.7±8.3 | | 0.014 | | 17.2±8.7 | 14.9±8.8 | | 0.069 | |

**Abbreviations**: IPTW, inverse probability of treatment weighting; NCRT, neoadjuvant chemoradiotherapy; NICT, neoadjuvant immunotherapy combined with chemotherapy; TRG, tumor regression grade; pCR, pathological complete remission; LVSI, lymphovascular invasion.

**Supplemental Table 4** Failure modes after radical esophagectomy.

| Failure mode | Before IPTW | | | After IPTW | | |
| --- | --- | --- | --- | --- | --- | --- |
| NCRT(n=200) | NICT(n=81) | *P* value | NCRT(n=262) | NICT(n=275) | P value | |
| LRR | 8 (4.0%) | 10 (12.3%) | 0.010 | 9 ( 3.4%) | 34 ( 12.4%) | 0.006 |
| Metastasis | 13 (6.5%) | 1 (1.2%) | 0.067 | 17 ( 6.5%) | 4 ( 1.5%) | 0.112 |

**Abbreviations**: IPTW, inverse probability of treatment weighting; NCRT, neoadjuvant chemoradiotherapy; NICT, neoadjuvant immunotherapy combined with chemotherapy; LRR, locoregional recurrences.


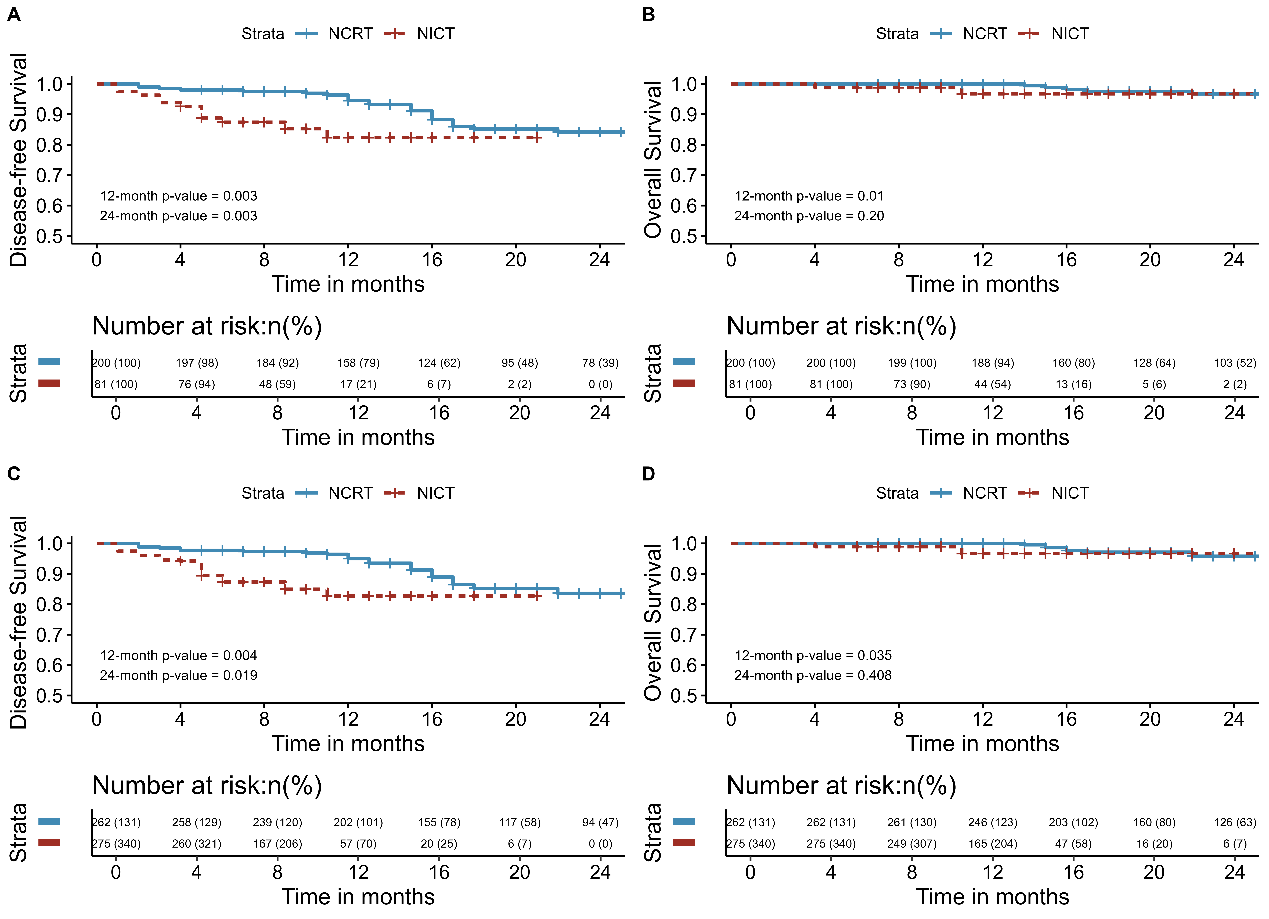


Supplemental Figure 1 Kaplan-Meier survival analysis of DFS (**A**) and OS (**B**) between NCRT and NICT before inverse probability of treatment weighting; Kaplan-Meier survival analysis of DFS (**C**) and OS (**D**) between NCRT and NICT after inverse probability of treatment weighting

**Abbreviations**: DFS, disease-free survival; OS, overall survival; NCRT, neoadjuvant chemoradiotherapy; NICT, neoadjuvant immunotherapy combined with chemotherapy.


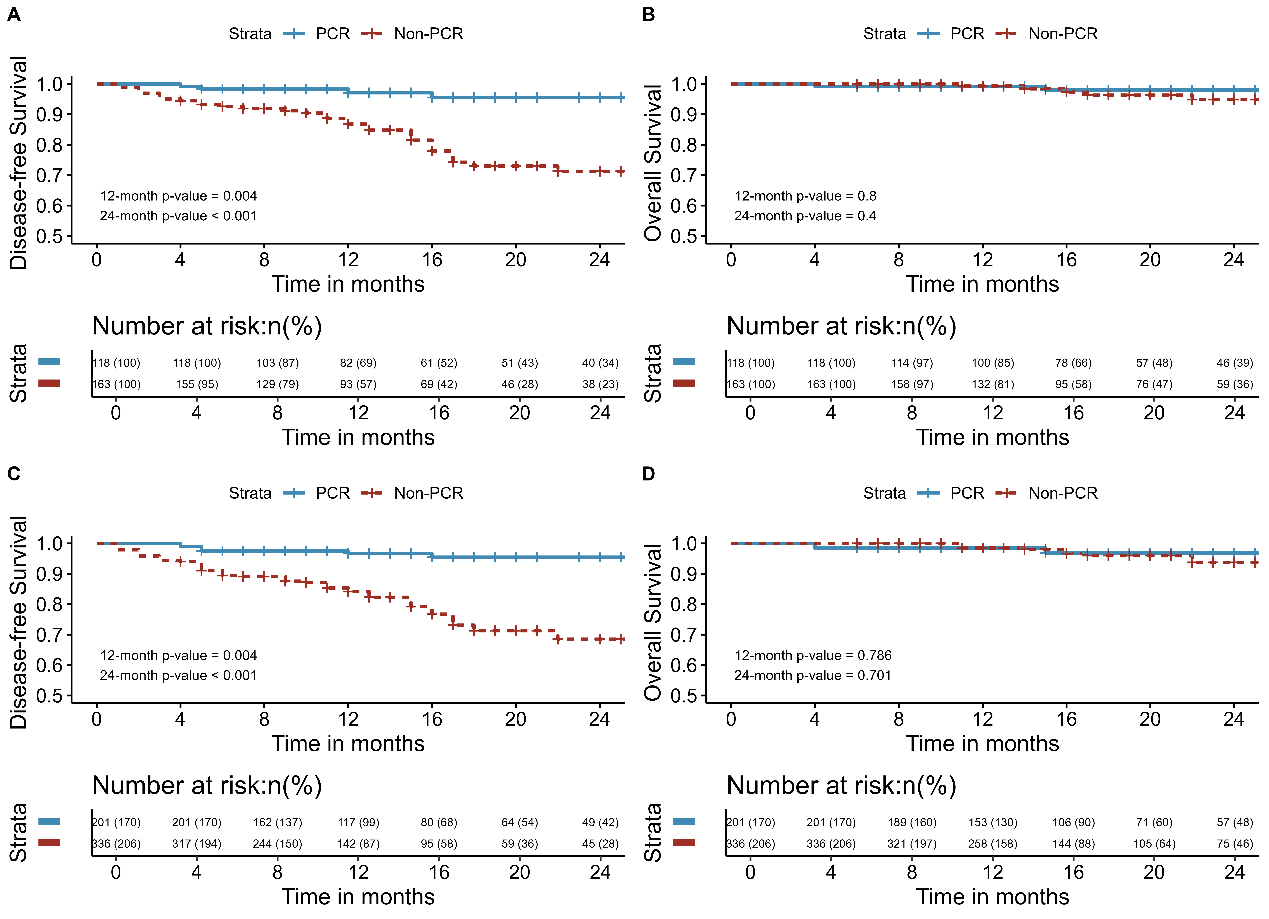


Supplemental Figure 2Kaplan-Meier survival analysis of DFS (**A**) and OS (**B**) between pCR and Non-pCR before inverse probability of treatment weighting; Kaplan-Meier survival analysis of DFS (**C**) and OS (**D**) between pCR and Non-pCR after inverse probability of treatment weighting.

**Abbreviations**: DFS, disease-free survival; OS, overall survival; pCR, pathological complete remission
